# Supplementary material
Source: MDPI journal article supplement (https://www.mdpi.com/1999-4907/14/7/1400)
Supplement: s1 [file s1]

**Table S4**

The multivariate simple effects of physiological indicators

|                                    | F    | <i>p</i> | Partial $\eta^2$ |
|------------------------------------|------|----------|------------------|
| <b>EEG-<math>\alpha</math> (%)</b> |      |          |                  |
| T1                                 | 1.37 | 0.290    | 0.22             |
| T2                                 | 0.72 | 0.554    | 0.13             |
| T3                                 | 4.82 | 0.015 *  | 0.49             |
| <b>EEG-<math>\beta</math> (%)</b>  |      |          |                  |
| T1                                 | 1.41 | 0.278    | 0.22             |
| T2                                 | 0.64 | 0.600    | 0.11             |
| T3                                 | 4.80 | 0.015 *  | 0.49             |
| <b>LF/HF</b>                       |      |          |                  |
| T1                                 | 0.68 | 0.578    | 0.11             |
| T2                                 | 0.53 | 0.670    | 0.09             |
| T3                                 | 0.19 | 0.903    | 0.03             |
