# Supplementary material
Source: MDPI journal article supplement (https://www.mdpi.com/1999-4907/14/7/1400)
Supplement: s1 [file s1]

**Table S3** EEG results of two-way repeated-measures ANOVAs

|                                    | F       | <i>p</i>   | Partial $\eta^2$ |
|------------------------------------|---------|------------|------------------|
| <b>EEG-<math>\alpha</math> (%)</b> |         |            |                  |
| Time                               | 340.27  | < 0.001*** | 0.98             |
| Site                               | 2.42    | 0.083      | 0.13             |
| Time * Site                        | 2.12    | 0.126      | 0.52             |
| <b>EEG-<math>\beta</math> (%)</b>  |         |            |                  |
| Time                               | 53.15   | < 0.001*** | 0.76             |
| Site                               | 1.80    | 0.162      | 0.10             |
| Time * Site                        | 1.62    | 0.175      | 0.09             |
| <b>LF/HF</b>                       |         |            |                  |
| Time                               | 140.539 | < 0.001*** | 0.88             |
| Site                               | 0.406   | 0.698      | 0.02             |
| Time * Site                        | 0.210   | 0.943      | 0.01             |

\*\*\*  $p < 0.001$ .
