# Supplementary material
Source: MDPI journal article supplement (https://www.mdpi.com/1999-4907/14/7/1400)
Supplement: s1 [file s1]

**Table S1 The Order of subjects' participation**

| Day | Time              |                   | Experimental site | Date       |
|-----|-------------------|-------------------|-------------------|------------|
|     | AM (8:30-12:30)   | PM (1:30-5:30)    |                   |            |
| 1   | Group A, NO.1-5   | Group A, NO.6-10  | Grassplot         | 2021.10.11 |
| 2   | Group B, NO.10-15 | Group B, NO.16-20 | Square            | 2021.10.12 |
| 3   | Group C, NO.21-25 | Group C, NO.26-30 | Forest            | 2021.10.13 |
| 4   | Group D, NO.31-35 | Group D, NO.36-39 | Lakeside          | 2021.10.18 |
| 5   | Group A, NO.6-10  | Group A, NO.1-5   | Square            | 2021.10.19 |
| 6   | Group B, NO.16-20 | Group B, NO.10-15 | Forest            | 2021.10.21 |
| 7   | Group C, NO.26-30 | Group C, NO.21-25 | Lakeside          | 2021.10.25 |
| 8   | Group D, NO.36-39 | Group D, NO.31-35 | Grassplot         | 2021.10.26 |
| 9   | Group A, NO.1-5   | Group A, NO.6-10  | Forest            | 2021.10.27 |
| 10  | Group B, NO.10-15 | Group B, NO.16-20 | Lakeside          | 2021.10.28 |
| 11  | Group C, NO.21-25 | Group C, NO.26-30 | Grassplot         | 2021.10.29 |
| 12  | Group D, NO.31-35 | Group D, NO.36-39 | Square            | 2021.11.01 |
| 13  | Group A, NO.6-10  | Group A, NO.1-5   | Lakeside          | 2021.11.02 |
| 14  | Group B, NO.16-20 | Group B, NO.10-15 | Grassplot         | 2021.11.03 |
| 15  | Group C, NO.26-30 | Group C, NO.21-25 | Square            | 2021.11.04 |
| 16  | Group D, NO.36-39 | Group D, NO.31-35 | Forest            | 2021.11.05 |
