# Supplementary material
Source: MDPI journal article supplement (https://www.mdpi.com/1999-4907/14/7/1400)
Supplement: s1 [file s1]

**Table S5** Pairwise Comparisons of EEG in the restoration stage

|                                     | Mean Difference | Std. Error | <i>p</i> | 95% CI for Difference |       | <i>t</i> |
|-------------------------------------|-----------------|------------|----------|-----------------------|-------|----------|
| <b>EEG -<math>\alpha</math> (%)</b> |                 |            |          | Lower                 | Upper |          |
| A-B                                 | 1.60            | 1.10       | 0.982    | -1.68                 | 4.87  | 1.46     |
| A-C                                 | -0.85           | 1.16       | >0.999   | -4.31                 | 2.61  | -0.74    |
| A-D                                 | -1.24           | 0.86       | 0.996    | -3.81                 | 1.32  | -1.45    |
| B-C                                 | -2.45           | 0.69       | 0.015 *  | -4.51                 | -0.40 | -3.56    |
| B-D                                 | -2.84           | 0.99       | 0.064    | -5.80                 | 0.12  | -2.87    |
| C-D                                 | -0.39           | 1.01       | >0.999   | -3.40                 | 2.62  | -0.39    |
| <b>EEG -<math>\beta</math> (%)</b>  |                 |            |          |                       |       |          |
| A-B                                 | -3.01           | 1.13       | 0.096    | -6.37                 | 0.35  | -2.67    |
| A-C                                 | -0.15           | 1.50       | >0.999   | -4.61                 | 4.32  | -0.10    |
| A-D                                 | 0.79            | 1.14       | >0.999   | -2.61                 | 4.18  | 0.69     |
| B-C                                 | 2.86            | 1.43       | 0.370    | -1.41                 | 7.13  | 2.00     |
| B-D                                 | 3.80            | 1.00       | 0.009 ** | 0.81                  | 6.78  | 3.79     |
| C-D                                 | 0.93            | 1.52       | >0.999   | -3.59                 | 5.46  | 0.62     |

Adjustment for multiple comparisons: Bonferroni. \*  $p < 0.05$ , \*\*  $p < 0.01$ , \*\*\*  $p < 0.001$ .
