# Supplementary material
Source: MDPI journal article supplement (https://www.mdpi.com/1999-4907/14/7/1400)
Supplement: s1 [file s1]

**Equation S1** The interaction effects of site\*time:

/EMMEANS=TABLES(time\*site) COMPARE(time) ADJ(BONFERRONI)

/EMMEANS=TABLES(time\*site) COMPARE(site) ADJ(BONFERRONI)
